# Supplementary material for: Enriching a primary health care version of ICD-10 using SNOMED CT mapping
Source: Springer Nature journal article supplement (doi:10.1186/2041-1480-1-7), 2010-01-01

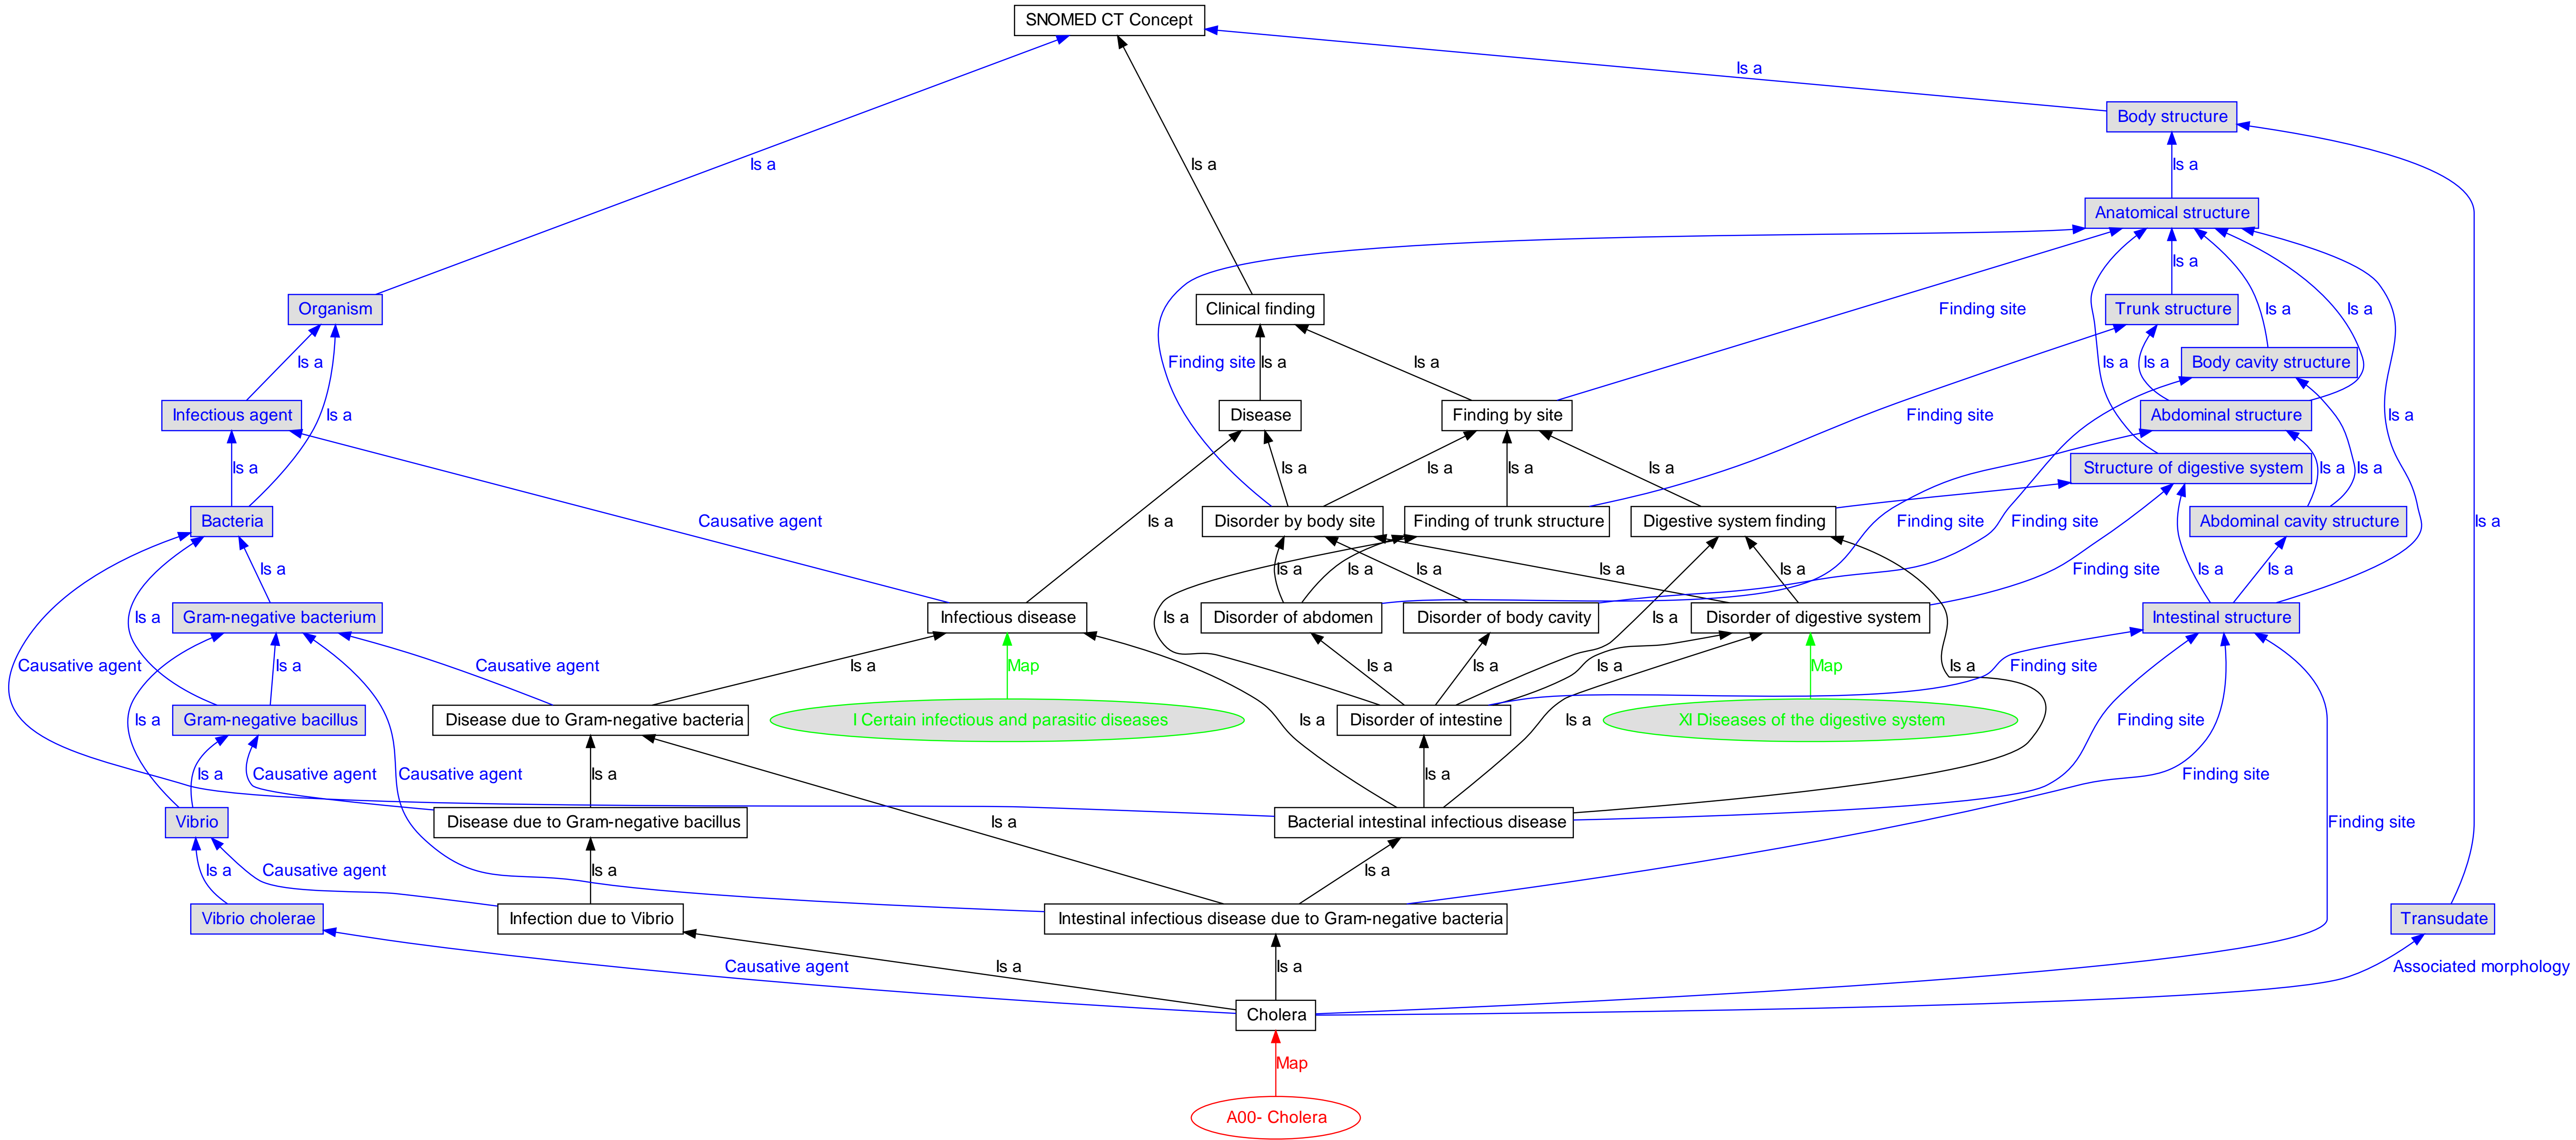

Supplement: 13326_2009_7_MOESM4_ESM.pdf [file 13326_2009_7_MOESM4_ESM.pdf]
